# Supplementary material for: The Microphenotron: a novel method for screening plant growth-promoting rhizobacteria
Source: PeerJ journal article supplement (doi:10.7717/peerj.13438), 2022-05-13
Supplement: Figure_S1.pdf [file Figure_S1.pdf]

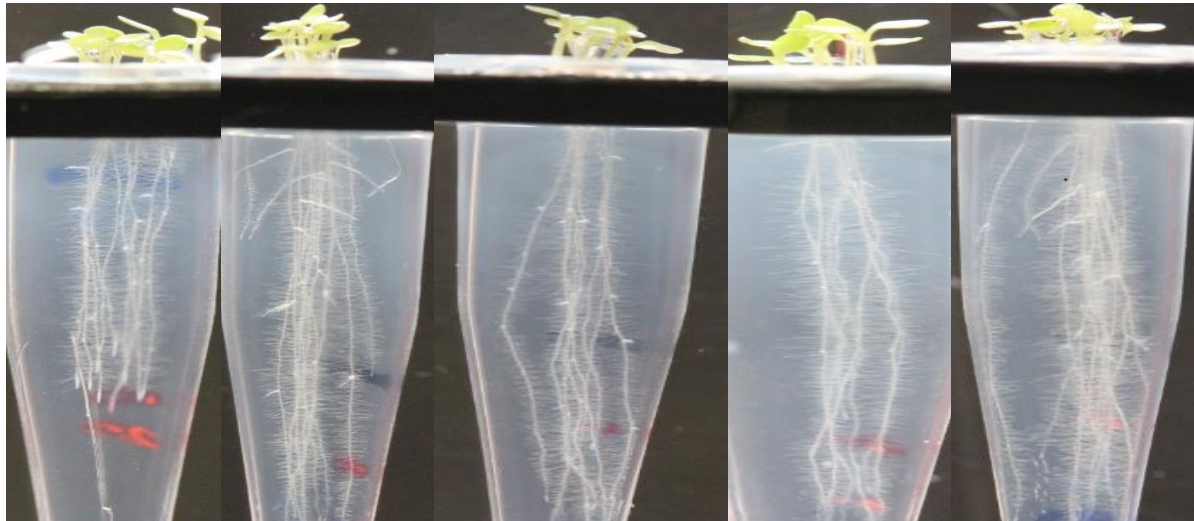

**Figure S1.** Screening bioassay through novel 96 well PCR plate method. Tube on the left side is control followed by *Pro. fasciculus* S-3, *B. thuringiensis* S-26, *M. pluranimalium* S-29 and *P. stutzeri* S-80 under controlled axenic condition.
