# Supplementary material for: The Microphenotron: a novel method for screening plant growth-promoting rhizobacteria
Source: PeerJ journal article supplement (doi:10.7717/peerj.13438), 2022-05-13
Supplement: Figure_S2.pdf [file Figure_S2.pdf]

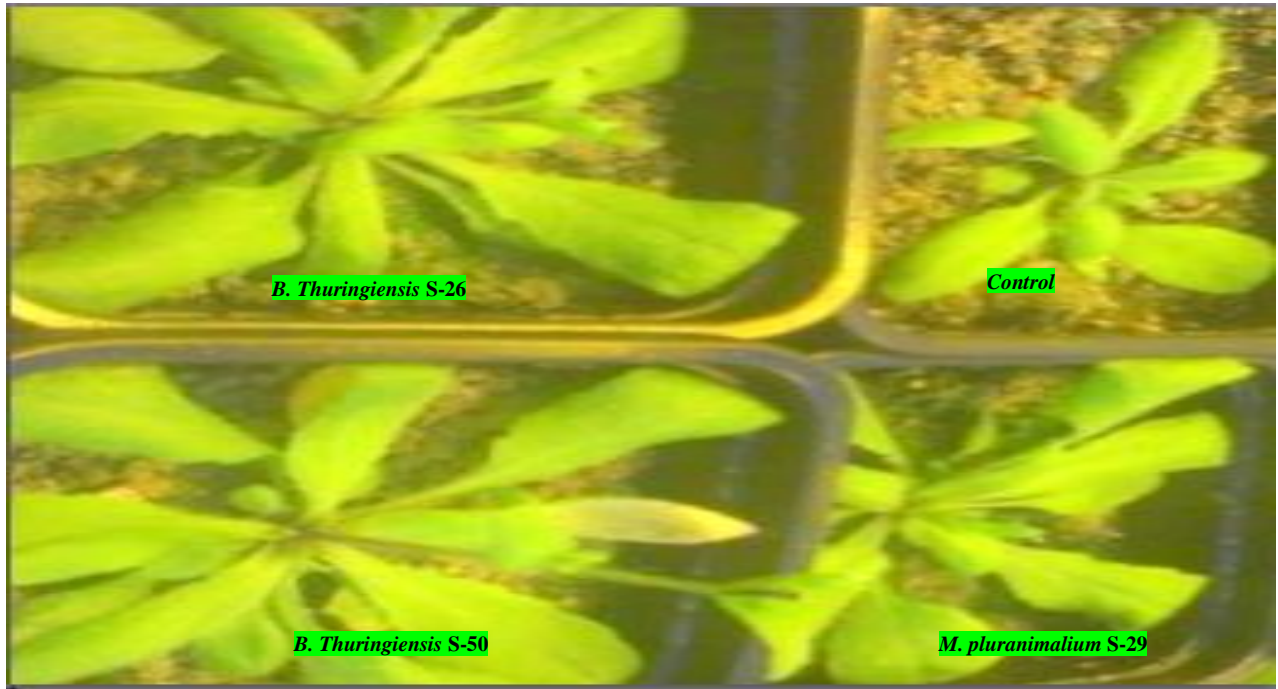

**Figure S2.** Pot trials with *A. thaliana* wild type (Columbia N6000), inoculated with *B. thuringiensis* S-26, *M. pluranimalium* S-29 and *B. thuringiensis* S-50 in comparison with un-inoculated control
