# Supplementary material for: The Microphenotron: a novel method for screening plant growth-promoting rhizobacteria
Source: PeerJ. 2022 May 13;10:e13438. doi: 10.7717/peerj.13438 (PMC9109696; doi:10.7717/peerj.13438)
Supplement: Supplemental Information 1 [file peerj-10-13438-s001.xlsx]

## Sheet: Sheet1
Strains	0	0.25M	0.25M	0.5M	0.5M	0.75M	0.75M	1M	1M			0.25M	0.5M	0.75M	1M
S3	1	80.1029	83.1029	49.2457	51.5457	24.1029	27.2529	23.1029	25.1029	Mean	1	80.1029	49.2457	24.1029	23.1029
S6	2	175.674	178.674	172.531	174.831	143.817	146.967	134.674	136.674		1	83.1029	51.5457	27.2529	25.1029
S7	3	148.103	151.103	184.103	186.403	183.389	186.539	160.531	162.531		2	175.674	172.531	143.817	134.674
S10	4	178.531	181.531	152.817	155.117	111.389	113.489	125.674	127.374		2	178.674	174.831	146.967	136.674
S11	5	173.389	176.389	117.817	120.117	109.817	111.917	94.2457	95.9457		3	148.103	184.103	183.389	160.531
S24	6	142.817	144.817	134.817	137.117	117.389	119.489	82.6743	84.3743		3	151.103	186.403	186.539	162.531
S26	7	103.674	105.674	99.5314	102.331	89.1029	91.2029	44.5314	46.2314		4	178.531	152.817	111.389	125.674
S29	8	108.531	110.531	49.96	52.76	55.3886	57.4886	29.3886	32.3886		4	181.531	155.117	113.489	127.374							97.5314	101.531	44.96	49.76	52.3886	55.4886	25.3886	29.3886
S50	9	53.5314	55.5314	50.1029	52.9029	39.2457	40.7457	30.8171	33.8171		5	173.389	117.817	109.817	94.2457							42.5314	46.5314	45.1029	49.9029	36.2457	38.7457	26.8171	30.8171
S80	10	85.3886	87.3886	72.3886	75.1886	49.6743	51.1743	39.2457	42.2457		5	176.389	120.117	111.917	95.9457							74.3886	78.3886	67.3886	72.1886	46.6743	49.1743	35.2457	39.2457
S121	11	100.246	102.246	71.2457	74.0457	93.6743	95.1743	54.1029	57.1029		6	142.817	134.817	117.389	82.6743							89.2457	93.2457	66.2457	71.0457	90.6743	93.1743	50.1029	54.1029
S125	12	91.6743	92.6743	60.3886	63.1886	48.8171	50.3171	43.1029	46.1029		6	144.817	137.117	119.489	84.3743							80.6743	83.6743	55.3886	60.1886	45.8171	48.3171	39.1029	43.1029
S126	13	75.3886	76.3886	66.6743	69.4743	119.389	123.389	146.96	149.96		7	103.674	99.5314	89.1029	44.5314							64.3886	67.3886	61.6743	66.4743	116.389	121.389	142.96	146.96
S127	14	117.103	118.103	75.8171	78.8171	94.6743	98.6743	58.3886	61.3886		7	105.674	102.331	91.2029	46.2314							106.103	109.103	70.8171	75.8171	91.6743	96.6743	54.3886	58.3886
S128	15	123.531	124.531	47.6743	50.6743	44.2457	48.2457	33.1029	36.1029		8	108.531	49.96	55.3886	29.3886							112.531	115.531	42.6743	47.6743	41.2457	46.2457	29.1029	33.1029
S134	16	47.96	48.96	42.1029	45.1029	43.8171	47.8171	44.8171	48.4171		8	110.531	52.76	57.4886	32.3886							36.96	39.96	37.1029	42.1029	40.8171	45.8171	40.8171	45.4171
S137	17	93.3886	96.3886	80.2457	83.2457	64.5314	68.5314	50.1029	53.7029		9	53.5314	50.1029	39.2457	30.8171							82.3886	87.3886	75.2457	80.2457	61.5314	66.5314	46.1029	50.7029
S142	18	64.5314	67.5314	60.1029	63.1029	55.8171	59.8171	44.96	48.56		9	55.5314	52.9029	40.7457	33.8171							53.5314	58.5314	55.1029	60.1029	52.8171	57.8171	40.96	45.56
D1	19	97.5314	101.531	44.96	49.76	52.3886	55.4886	25.3886	29.3886		10	85.3886	72.3886	49.6743	39.2457
D2	20	42.5314	46.5314	45.1029	49.9029	36.2457	38.7457	26.8171	30.8171		10	87.3886	75.1886	51.1743	42.2457
D3	21	74.3886	78.3886	67.3886	72.1886	46.6743	49.1743	35.2457	39.2457		11	100.246	71.2457	93.6743	54.1029
D5	22	89.2457	93.2457	66.2457	71.0457	90.6743	93.1743	50.1029	54.1029		11	102.246	74.0457	95.1743	57.1029
D6	23	80.6743	83.6743	55.3886	60.1886	45.8171	48.3171	39.1029	43.1029		12	91.6743	60.3886	48.8171	43.1029
D8	24	64.3886	67.3886	61.6743	66.4743	116.389	121.389	142.96	146.96		12	92.6743	63.1886	50.3171	46.1029
D11	25	106.103	109.103	70.8171	75.8171	91.6743	96.6743	54.3886	58.3886		13	75.3886	66.6743	119.389	146.96
D49	26	112.531	115.531	42.6743	47.6743	41.2457	46.2457	29.1029	33.1029		13	76.3886	69.4743	123.389	149.96
D50	27	36.96	39.96	37.1029	42.1029	40.8171	45.8171	40.8171	45.4171		14	117.103	75.8171	94.6743	58.3886
D51	28	82.3886	87.3886	75.2457	80.2457	61.5314	66.5314	46.1029	50.7029		14	118.103	78.8171	98.6743	61.3886
D61	29	53.5314	58.5314	55.1029	60.1029	52.8171	57.8171	40.96	45.56		15	123.531	47.6743	44.2457	33.1029
											15	124.531	50.6743	48.2457	36.1029
											16	47.96	42.1029	43.8171	44.8171
											16	48.96	45.1029	47.8171	48.4171
											17	93.3886	80.2457	64.5314	50.1029
											17	96.3886	83.2457	68.5314	53.7029
											18	64.5314	60.1029	55.8171	44.96
											18	67.5314	63.1029	59.8171	48.56
											19	89.3886	78.1886	55.1743	44.6457
											19	88.3886	76.3886	50.6743	41.2457
											20	102.246	76.2457	96.6743	57.4029
											20	93.6743	63.3886	52.8171	48.1029
											21	97.5314	44.96	52.3886	25.3886
											21	101.531	49.76	55.4886	29.3886
											22	42.5314	45.1029	36.2457	26.8171
											22	46.5314	49.9029	38.7457	30.8171
											23	74.3886	67.3886	46.6743	35.2457
											23	78.3886	72.1886	49.1743	39.2457
											24	89.2457	66.2457	90.6743	50.1029
											24	93.2457	71.0457	93.1743	54.1029
											25	80.6743	55.3886	45.8171	39.1029
											25	83.6743	60.1886	48.3171	43.1029
											26	64.3886	61.6743	116.389	142.96
											26	67.3886	66.4743	121.389	146.96
											27	106.103	70.8171	91.6743	54.3886
											27	109.103	75.8171	96.6743	58.3886
											28	112.531	42.6743	41.2457	29.1029
											28	115.531	47.6743	46.2457	33.1029
											29	36.96	37.1029	40.8171	40.8171
											29	39.96	42.1029	45.8171	45.4171
											30	82.3886	75.2457	61.5314	46.1029
											30	87.3886	80.2457	66.5314	50.7029
											31	53.5314	55.1029	52.8171	40.96
											31	58.5314	60.1029	57.8171	45.56
