# Supplementary material for: The Microphenotron: a novel method for screening plant growth-promoting rhizobacteria
Source: PeerJ. 2022 May 13;10:e13438. doi: 10.7717/peerj.13438 (PMC9109696; doi:10.7717/peerj.13438)
Supplement: Supplemental Information 2 [file peerj-10-13438-s002.xlsx]

## Sheet: Sheet1
			Leaf area	number of leaves/plant	Rosette fresh weight	plant fresh weight
	Control	1	19.25	11.6	0.57	1.65
		1	17.6	11.3	0.45	1.5
		1	19.5	11.5	0.51	1.6
	S3	2	23.5	17.2	0.9	1.95
		2	25.6	15.6	0.8	1.8
		2	24.3	16.5	0.91	1.85
	S6	3	24.6	15.9	0.85	2.14
		3	26.6	17.5	0.7	2.1
		3	25.5	16.5	0.89	2.1
	S7	4	25.4	14.2	0.96	2.3
		4	27.6	13.6	0.95	2.31
		4	26.8	13.9	0.93	2.5
	S10	5	25.3	16.6	0.67	1.96
		5	24.5	17.1	0.6	1.8
		5	25	16.9	0.64	1.9
	S24	6	26.5	16.6	0.66	1.88
		6	27.9	17.5	0.5	1.8
		6	27.6	17.1	0.59	1.85
	S26	7	23.4	16	0.72	2.1
		7	25.5	17.6	0.7	2.1
		7	24.5	16.9	0.72	2.3
	S29	8	28.6	14.6	0.7	2.6
		8	29.9	15.6	0.69	2.7
		8	28.9	15.1	0.69	2.65
	S50	9	26.4	15.6	0.82	2.14
		9	26.5	16.3	0.83	2.1
		9	25.9	15.9	0.82	2.13
	S80	10	25.4	17.6	0.73	2
		10	26.6	18.1	0.8	1.99
		10	25.9	17.9	0.76	2.2

## Sheet: Sheet2
			Leaf Area
		Control	18.427
		S3	24.55
		S6	25.6
		S7	26.5
		S10	24.9
		S24	27.2
		S26	24.45
		S29	29.25
		S50	26.45
		S80	26
			Number of leaves
		Control	11.45
		S3	16.4
		S6	16.7
		S7	13.9
		S10	16.85
		S24	17.05
		S26	16.8
		S29	15.1
		S50	15.95
		S80	17.85
			rosette fresh weight
		Control	0.511
		S3	0.85
		S6	0.775
		S7	0.955
		S10	0.635
		S24	0.58
		S26	0.709
		S29	0.697
		S50	0.825
		S80	0.7665
			plant fresh weight
		Control	1.57565
		S3	1.875
		S6	2.12
		S7	2.305
		S10	1.88
		S24	1.84
		S26	2.1
		S29	2.65
		S50	2.12
		S80	2.05
